# Supplementary material
Source: PubMed Central journal article supplement (PMC3837797)
Supplement: AEM.02229-13_zam999104965so1.pdf [file AEM.02229-13_zam999104965so1.pdf]

Table S1. Numbers of putative orphan MTases and their predicted activity across several species of bacteriophages

| <i>Phage*</i>                                      | <i>Gene/orf</i> | <i>Genbank/NCBI ID</i> | <i>Reference</i> | <i>Number of orphan MTases within phage species*</i> |
|----------------------------------------------------|-----------------|------------------------|------------------|------------------------------------------------------|
| <b><i>N6- Methyladenine activity</i></b>           |                 |                        |                  |                                                      |
| <i>Acintobacter buamannii</i> AB1                  | orf56           | ADO14427.1             | (103)            | 2                                                    |
| <i>Aeromonas</i> phage vB AsaM-56                  | gp11            | YP_007007700.1         | (104)            | 2                                                    |
| <i>Aggregatibacter</i> phage S1249                 | gp20            | NC_013597.1            | (105)            | 1                                                    |
| <i>Sinorhizobium</i> phage PBC5                    | orf6            | NC_003324.1            | -                | 1                                                    |
| <i>Stx2</i> converting phage II ( <i>E. coli</i> ) | orfc66          | NC_004914.2            | (106)            | 2                                                    |
| <i>Colwellia</i> phage 9A                          | g088            | YP_006489274.1         | -                | 1                                                    |
| <i>Salmonella</i> phage epsilon15                  | p29             | NC_004775              | (107)            | 7                                                    |
| <i>Persicivirga</i> phage P12024L                  | gp28            | NC_018272.1            | (108)            | 2                                                    |
| <i>Shigella</i> phage Shf1a                        | gp62            | YP_004414877.1         | -                | 2                                                    |
| <i>Erwinia</i> phage phiEaH2                       | orf28           | JX316028.1             | (109)            | 2                                                    |
| <i>Providencia</i> phage Redjac                    | orf14           | NC_018832.1            | -                | 2                                                    |
| <i>Cronobacter</i> phage ESP2949-1                 | gp26            | YP_007005414.1         | (110)            | 3                                                    |
| <i>Escherichia</i> phage PBECO 4                   | orf147          | KC295538.1             | -                | 6                                                    |
| <i>Wolbachia</i> phage WO-A                        | orf263          | NP_966069.1            | (111)            | 4                                                    |
| <i>Riemerella</i> phage RAP44                      | gp58            | NC_019490.1            | (112)            | 1                                                    |
| <i>Bacteroides</i> phage B40-8                     | orf15           | NC_011222.1            | (113)            | 1                                                    |
| <i>Haemophilus</i> phage HP2                       | p12             | NP_536818.1            | (114)            | 3                                                    |
| <i>Flavobacterium</i> phage 11b                    | orf65           | NC_006356.2            | (115)            | 1                                                    |
| <i>Yersinia</i> phage PY100                        | orf33           | CAJ28432.1             | (72)             | 2                                                    |
| <i>Caulobacter</i> phage CcrMagneto                | gp125           | NC_019407.1            | (116)            | 5                                                    |
| <i>Campylobacter</i> phage NCTC12673               | gp102           | YP_004421654.1         | (117)            | 6                                                    |
| <i>Myxococcus</i> phage Mx8                        | orf5            | NC_003085.1            | -                | 1                                                    |
| <i>Enterobacteria</i> phage phi92                  | gp155           | CBY99584.1             | (118)            | 20                                                   |
| <i>Klebsiella</i> phage KP15                       | gp229           | YP_003580090.1         | -                | 3                                                    |
| <i>Prochlorococcus</i> phage P-SSM2                | orf58           | YP_214300.1            | (119)            | -                                                    |
| <i>Synechococcus</i> phage S-RIM2_R1_1999          | orf32           | YP_007675522.1         | -                | 7                                                    |
| <i>Burkholderia</i> phage Bcep176                  | gp44            | YP_355379.1            | -                | 1                                                    |
| <i>Escherichia</i> phage rv5                       | gp096/gp230     | YP_002003732.1         | -                | 3                                                    |

|                                            |       |                |       |    |
|--------------------------------------------|-------|----------------|-------|----|
| <i>Brucella</i> phage Tb                   | orf43 | AEY69712.1     | (68)  | 2  |
| <i>Vibrio</i> _phage_henriette_12B8        | orf15 | YP_007877988.1 | -     | 13 |
| <i>Pseudoalteromonas</i> phage H105/1      | gp25  | YP_004327118.1 | (120) | 1  |
| <i>Enterococcus</i> phage phiEf11          | orf51 | NC_013696.1    | (121) | 4  |
| <i>Leuconostoc</i> phage1-A4               | orf2  | ADD71725.1     | (122) | 2  |
| <i>Lactococcal</i> phage 949               | orf96 | NC_015263.1    | (123) | 2  |
| <i>Mycobacterium</i> phage Aeneas          | gp62  | AFL48073.1     | (124) | 29 |
| <i>Streptococcus</i> phage 7201            | orf13 | NP_038314.1    | (125) | 12 |
| <i>Lactobacillus</i> phage LBR48           | orf47 | ADF83450.1     | (126) | 7  |
| <i>Gordonia</i> phage GTE7                 | gp37  | YP_004934738.1 | (127) | 1  |
| <i>Rhodococcus</i> phage ReqiDocB7         | orf36 | ADD80822.1     | (128) | 1  |
| <i>Aeromonas</i> phage phiO18P             | orf33 | NC_009542.2    | (129) | 2  |
| <i>Listeria</i> phage PSA                  | orf33 | AJ312240       | (130) | 2  |
| <i>Staphylococcus</i> phage 80             | orf21 | DQ908929.1     | (131) | 3  |
| <i>Tetrasphaera</i> phage TJE1             | orf2  | HQ225832.1     | (132) | 1  |
| <b><i>m4c- Methylcytosine Activity</i></b> |       |                |       |    |
| <i>Salmonella</i> phage SE2                | gp51  | YP_005098147.1 | (133) | 1  |
| <i>Pseudomonas</i> phage B3                | orf48 | NC_006548.1    | (69)  | 2  |
| <i>Acidithiobacillus caldus</i> AcaML1     | orf24 | JX507079.1     | (134) | 1  |
| <i>Cronobacter</i> phage vB CsaM GAP32     | gp391 | YP_006987257.1 | -     | 1  |
| <i>Burkholderia</i> phage BcepIL02         | gp41  | NC_012743.2    | (135) | 5  |
| <i>Cyanophage</i> KBS-M-1A                 | gp86  | NC_020486.1    | (136) | 10 |
| <i>Pectobacterium</i> phage ZF40           | gp20  | YP_007006929.1 | (104) | 1  |
| <i>Prochlorococcus</i> phage P-HM1         | orf39 | YP_004322464.1 | (119) | 8  |
| <i>Synechococcus</i> phage metaGMbCM1      | gp157 | YP_007001649.1 | -     | 19 |
| <i>Vibrio</i> phage VP882                  | gp37  | YP_001039848.1 | (137) | 1  |
| <i>Stenotrophomonas</i> phage S1           | gp23  | YP_002321474.1 | (138) | 1  |
| <i>Mycobacterium</i> phage Baka            | gp151 | AEK08207.1     | (124) | 17 |
| <i>Listeria</i> phage 2389                 | gp38  | NP_511017.1    | (130) | 2  |
| <i>Clostridium</i> phage phiCD119          | gp70  | YP_529621.1    | (139) |    |
| <b><i>m5c-Methylcytosine Activity*</i></b> |       |                |       |    |
| <i>Klebsiella</i> phage KP15               | gp115 | YP_003579981.1 | -     | 2  |
| <i>Brucella</i> phage Tb                   | orf42 | YP_007002108.1 | (68)  | 2  |
| <i>Bordetella</i> _phage_BIP-1             | p29   | NP_996640.1    | (140) | 2  |
| <i>Campylobacter</i> _phage_CGC-2007       | -     | ABU53707.1     | (141) | 1  |

|                                        |         |                |       |    |
|----------------------------------------|---------|----------------|-------|----|
| <i>Edwardsiella ictaluri</i> eiAU      | orf6    | HQ824553.1     | -     | 1  |
| <i>Vibrio</i> phage CP-T1              | gp12    | YP_007003052.1 | (104) | 6  |
| <i>Caulobacter</i> phage CcrKarma      | gp126   | NC_019410.1    | (116) | 6  |
| <i>Shigella</i> phage pSf1             | gp21    | YP_008059743.1 | -     | 2  |
| <i>Salmonella</i> phage epsilon15      | gp41    | NC_004775      | (107) | 3  |
| <i>Pseudomonas</i> phage F116          | orf10   | NC_006552.1    | (142) | 4  |
| <i>Croceibacter</i> phage P2559S       | orf55   | NC_018276.1    | (143) | 1  |
| <i>Sinorhizobium</i> phage PBC5        | orf15   | NC_003324.1    | -     | 1  |
| <i>Xanthomonas</i> phage vB_XveM_DIBBI | orf43   | NC_017981.1    | -     | 1  |
| <i>Cyanophage</i> S-TIM5               | orf152  | NC_019516.1    | (144) | 1  |
| <i>Rhodobacter</i> phage RcapNL        | orf39   | JQ066768.1     | -     | 2  |
| <i>Escherichia</i> phage K1-dep        | orf31   | GU196277.1     | (145) | 3  |
| <i>Cronobacter</i> phage vB_CsaM_GAP32 | gp151   | YP_006987497.1 | -     | 2  |
| <i>Enterobacteria</i> phage RB43       | orf127c | YP_239103.1    | -     | 8  |
| <i>Synechococcus</i> phage S-CBS2      | gp5     | YP_004421459.1 | (146) | 2  |
| <i>Burkholderia</i> phage KL3          | gp47    | YP_004306459.1 | (74)  | 16 |
| <i>Thermus</i> phage P23-45            | p14     | YP_001467867.1 | (147) | 2  |
| <i>Streptococcus</i> phage MM1         | orf13   | NP_150145.1    | (148) | 10 |
| <i>Bacillus</i> Phage H2               | -       | M72412.1       | (58)  | 7  |
| <i>Lactococcal</i> phage 4268          | orf14   | NP_839905.1    | (88)  | 3  |
| <i>Enterococcus</i> phage phiFL1A      | orf24   | NC_013646.1    | (149) | 5  |
| <i>Clostridium</i> phage phiCD27       | gp62    | YP_002290938.1 | (150) | 5  |
| <i>Lactobacillus</i> phage LC-Nu       | gp40    | YP_358798.1    | (151) | 2  |
| <i>Mycobacterium</i> phage corndog     | gp7     | NC_004685.1    | (124) | 68 |
| <i>Streptomyces</i> phage phiBT1       | orf9.1  | NP_813725.1    | (152) | 1  |
| <i>Saccharomonospora</i> phage PIS     | orf81   | JX006077.1     | (153) | 1  |
| <i>Mycoplasma</i> phage MAV1           | orf4    | NC_001942.1    | (154) | 1  |
| <i>Acidithiobacillus caldus</i> AcaML1 | orf65   | JX507079.1     | (134) | 1  |

\* Methylation activity and distribution among species determined by blasting putative phage orphan MTases against the REBASE database. One example of a phage encoded MTase for each bacterial species is listed in column 1.

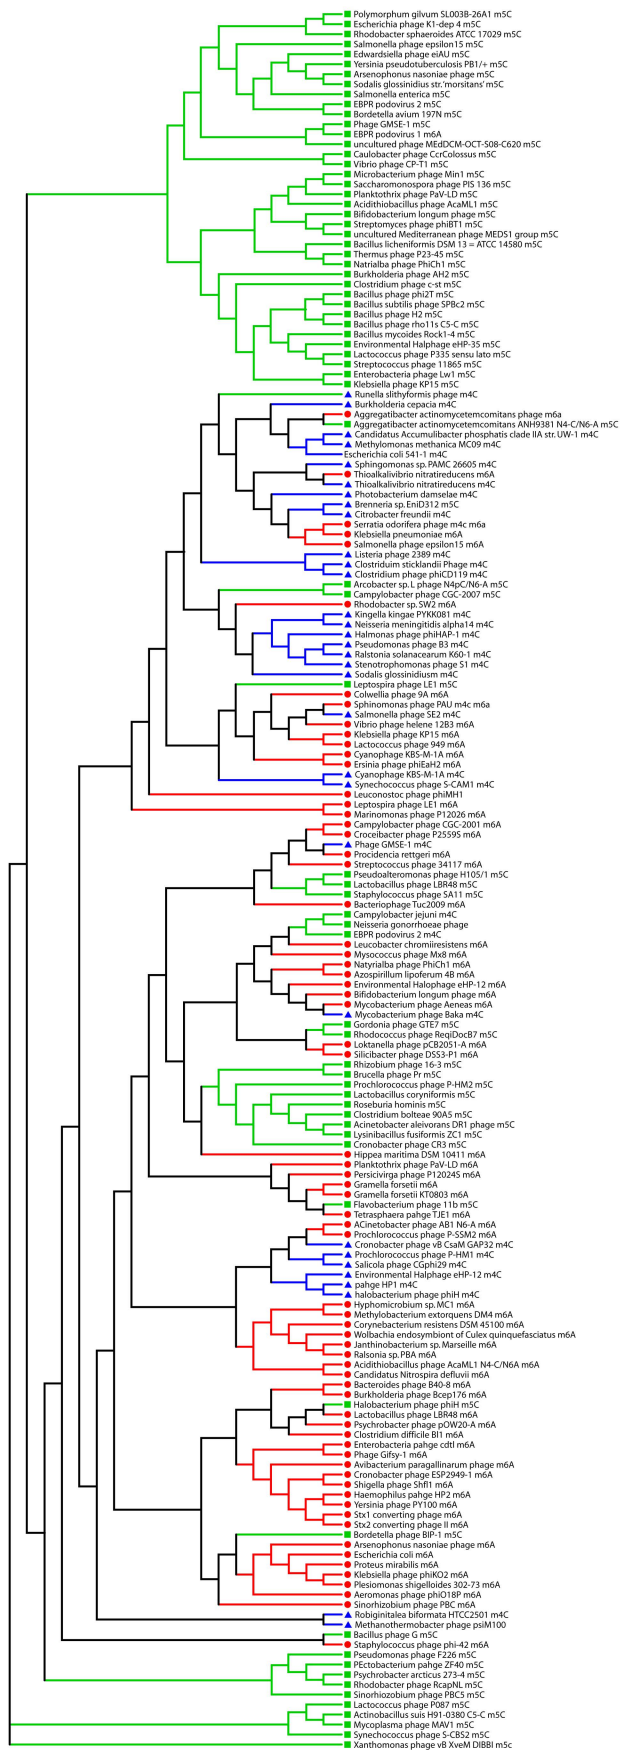

**Figure S1.** Phylogenetic tree of representative phage orphan methyltransferases highlighting the three functional classes. 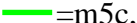 =m5c,  = m6a  = m4c. BLASTP analysis was performed on putative bacteriophage methyltransferases against all methyltransferases available on REBASE to assign methyltransferase subtype (e value cut off  $10^{-10}$ ). One phage encoding a putative MTase associated with each bacterial species was selected to generate a representative tree. Sequence alignments of the putative MTases were performed using ClustalOmega (<http://www.ebi.ac.uk/Tools/msa/clustalo/>) and visualized using Mega5.

58. **Lange C, Noyer-Weidner M, Trautner TA, Weiner M, Zahler SA.** 1991. M.H2I, a multispecific 5C-DNA methyltransferase encoded by *Bacillus amyloliquefaciens* phage H2. *Gene* **100**:213-218.
68. **Flores V, Lopez-Merino A, Mendoza-Hernandez G, Guarneros G.** 2012. Comparative genomic analysis of two brucellaphages of distant origins. *Genomics* **99**:233-240.
69. **Braid MD, Silhavy JL, Kitts CL, Cano RJ, Howe MM.** 2004. Complete genomic sequence of bacteriophage B3, a Mu-like phage of *Pseudomonas aeruginosa*. *J Bacteriol* **186**:6560-6574.
72. **Schwudke D, Ergin A, Michael K, Volkmar S, Appel B, Knabner D, Konietzny A, Strauch E.** 2008. Broad-host-range *Yersinia* phage PY100: genome sequence, proteome analysis of virions, and DNA packaging strategy. *J Bacteriol* **190**:332-342.

74. **Lynch KH, Stothard P, Dennis JJ.** 2010. Genomic analysis and relatedness of P2-like phages of the *Burkholderia cepacia* complex. *BMC Genomics* **11**:599.
88. **Trotter M, McAuliffe O, Callanan M, Edwards R, Fitzgerald GF, Coffey A, Ross RP.** 2006. Genome analysis of the obligately lytic bacteriophage 4268 of *Lactococcus lactis* provides insight into its adaptable nature. *Gene* **366**:189-199.
103. **Li P, Chen B, Song Z, Song Y, Yang Y, Ma P, Wang H, Ying J, Ren P, Yang L, Gao G, Jin S, Bao Q, Yang H.** 2012. Bioinformatic analysis of the *Acinetobacter baumannii* phage AB1 genome. *Gene* **507**:125-134.
104. **Comeau AM, Tremblay D, Moineau S, Rattei T, Kushkina AI, Tovkach FI, Krisch HM, Ackermann HW.** 2012. Phage morphology recapitulates phylogeny: the comparative genomics of a new group of myoviruses. *PLoS One* **7**:e40102.
105. **Chen C, Kittichotirat W, Si Y, Bumgarner R.** 2009. Genome sequence of *Aggregatibacter actinomycetemcomitans* serotype c strain D11S-1. *J Bacteriol* **191**:7378-7379.
106. **Sato T, Shimizu T, Watarai M, Kobayashi M, Kano S, Hamabata T, Takeda Y, Yamasaki S.** 2003. Genome analysis of a novel Shiga toxin 1 (Stx1)-converting phage which is closely related to Stx2-converting phages but not to other Stx1-converting phages. *J Bacteriol* **185**:3966-3971.
107. **Kropinski AM, Kovalyova IV, Billington SJ, Patrick AN, Butts BD, Guichard JA, Pitcher TJ, Guthrie CC, Sydlaske AD, Barnhill LM, Havens KA, Day KR,**

- Falk DR, McConnell MR.** 2007. The genome of epsilon15, a serotype-converting, Group E1 *Salmonella enterica*-specific bacteriophage. *Virology* **369**:234-244.
108. **Kang I, Jang H, Cho JC.** 2012. Complete genome sequences of two *Persicivirga* bacteriophages, P12024S and P12024L. *J Virol* **86**:8907-8908.
109. **Domotor D, Becsagh P, Rakhely G, Schneider G, Kovacs T.** 2012. Complete genomic sequence of *Erwinia amylovora* phage PhiEaH2. *J Virol* **86**:10899.
110. **Lee YD, Kim JY, Park JH, Chang H.** 2012. Genomic analysis of bacteriophage ESP2949-1, which is virulent for *Cronobacter sakazakii*. *Arch Virol* **157**:199-202.
111. **Wu M, Sun LV, Vamathevan J, Riegler M, Deboy R, Brownlie JC, McGraw EA, Martin W, Esser C, Ahmadinejad N, Wiegand C, Madupu R, Beanan MJ, Brinkac LM, Daugherty SC, Durkin AS, Kolonay JF, Nelson WC, Mohamoud Y, Lee P, Berry K, Young MB, Utterback T, Weidman J, Nierman WC, Paulsen IT, Nelson KE, Tettelin H, O'Neill SL, Eisen JA.** 2004. Phylogenomics of the reproductive parasite *Wolbachia pipientis* wMel: a streamlined genome overrun by mobile genetic elements. *PLoS Biol* **2**:E69.
112. **Cheng LF, Chen HM, Zheng T, Fu GH, Shi SH, Wan CH, Huang Y.** 2012. Complete genomic sequence of the virulent bacteriophage RAP44 of *Riemerella anatipestifer*. *Avian Dis* **56**:321-327.
113. **Hawkins SA, Layton AC, Ripp S, Williams D, Sayler GS.** 2008. Genome sequence of the *Bacteroides fragilis* phage ATCC 51477-B1. *Virol J* **5**:97.

114. **Williams BJ, Golomb M, Phillips T, Brownlee J, Olson MV, Smith AL.** 2002. Bacteriophage HP2 of *Haemophilus influenzae*. *J Bacteriol* **184**:6893-6905.
115. **Borriss M, Lombardot T, Glockner FO, Becher D, Albrecht D, Schweder T.** 2007. Genome and proteome characterization of the psychrophilic *Flavobacterium* bacteriophage 11b. *Extremophiles* **11**:95-104.
116. **Gill JJ, Berry JD, Russell WK, Lessor L, Escobar Garcia DA, Hernandez D, Kane A, Keene J, Maddox M, Martin R, Mohan S, Thorn AM, Russell DH, Young R.** 2012. The *Caulobacter crescentus* phage phiCbK: genomics of a canonical phage. *BMC Genomics* **13**:542.
117. **Kropinski AM, Arutyunov D, Foss M, Cunningham A, Ding W, Singh A, Pavlov AR, Henry M, Evoy S, Kelly J, Szymanski CM.** 2011. Genome and proteome of *Campylobacter jejuni* bacteriophage NCTC 12673. *Appl Environ Microbiol* **77**:8265-8271.
118. **Schwarzer D, Buettner FF, Browning C, Nazarov S, Rabsch W, Bethe A, Oberbeck A, Bowman VD, Stummeyer K, Muhlenhoff M, Leiman PG, Gerardy-Schahn R.** 2012. A multivalent adsorption apparatus explains the broad host range of phage phi92: a comprehensive genomic and structural analysis. *J Virol* **86**:10384-10398.
119. **Sullivan MB, Huang KH, Ignacio-Espinoza JC, Berlin AM, Kelly L, Weigele PR, DeFrancesco AS, Kern SE, Thompson LR, Young S, Yandava C, Fu R, Krastins B, Chase M, Sarracino D, Osburne MS, Henn MR, Chisholm SW.** 2010. Genomic



analysis of oceanic cyanobacterial myoviruses compared with T4-like myoviruses from diverse hosts and environments. *Environ Microbiol* **12**:3035-3056.

120. **Duhaime MB, Wichels A, Waldmann J, Teeling H, Glockner FO.** 2011. Ecogenomics and genome landscapes of marine *Pseudoalteromonas* phage H105/1. *ISME J* **5**:107-121.
121. **Stevens RH, Ektefaie MR, Fouts DE.** 2011. The annotated complete DNA sequence of *Enterococcus faecalis* bacteriophage phiEf11 and its comparison with all available phage and predicted prophage genomes. *FEMS Microbiol Lett* **317**:9-26.
122. **Lu Z, Altermann E, Breidt F, Kozyavkin S.** 2010. Sequence analysis of *Leuconostoc mesenteroides* bacteriophage Phi1-A4 isolated from an industrial vegetable fermentation. *Appl Environ Microbiol* **76**:1955-1966.
123. **Samson JE, Moineau S.** 2010. Characterization of *Lactococcus lactis* phage 949 and comparison with other lactococcal phages. *Appl Environ Microbiol* **76**:6843-6852.
124. **Hatfull GF.** 2012. Complete genome sequences of 138 mycobacteriophages. *J Virol* **86**:2382-2384.
125. **Stanley E, Walsh L, van der Zwet A, Fitzgerald GF, van Sinderen D.** 2000. Identification of four loci isolated from two *Streptococcus thermophilus* phage genomes responsible for mediating bacteriophage resistance. *FEMS Microbiol Lett* **182**:271-277.

126. **Jang SH, Yoon BH, Chang HI.** 2011. Complete nucleotide sequence of the temperate bacteriophage LBR48, a new member of the family *Myoviridae*. *Arch Virol* **156**:319-322.
127. **Petrovski S, Seviour RJ, Tillett D.** 2011. Prevention of *Gordonia* and *Nocardia* stabilized foam formation by using bacteriophage GTE7. *Appl Environ Microbiol* **77**:7864-7867.
128. **Summer EJ, Liu M, Gill JJ, Grant M, Chan-Cortes TN, Ferguson L, Janes C, Lange K, Bertoli M, Moore C, Orchard RC, Cohen ND, Young R.** 2011. Genomic and functional analyses of *Rhodococcus equi* phages ReqiPepy6, ReqiPoco6, ReqiPine5, and ReqiDocB7. *Appl Environ Microbiol* **77**:669-683.
129. **Beilstein F, Dreiseikelmann B.** 2008. Temperate bacteriophage PhiO18P from an *Aeromonas media* isolate: characterization and complete genome sequence. *Virology* **373**:25-29.
130. **Zimmer M, Sattelberger E, Inman RB, Calendar R, Loessner MJ.** 2003. Genome and proteome of *Listeria monocytogenes* phage PSA: an unusual case for programmed + 1 translational frameshifting in structural protein synthesis. *Mol Microbiol* **50**:303-317.
131. **Christie GE, Matthews AM, King DG, Lane KD, Olivarez NP, Tallent SM, Gill SR, Novick RP.** 2010. The complete genomes of *Staphylococcus aureus* bacteriophages 80 and 80alpha-implications for the specificity of SaPI mobilization. *Virology* **407**:381-390.

132. **Petrovski S, Tillett D, Seviour RJ.** 2012. Isolation and complete genome sequence of a bacteriophage lysing *Tetrasphaera jenkinsii*, a filamentous bacteria responsible for bulking in activated sludge. *Virus Genes* **45**:380-388.
133. **Tiwari BR, Kim S, Kim J.** 2012. Complete genomic sequence of *Salmonella enterica* serovar *enteritidis* phage SE2. *J Virol* **86**:7712.
134. **Tapia P, Flores FM, Covarrubias PC, Acuna LG, Holmes DS, Quatrini R.** 2012. Complete genome sequence of temperate bacteriophage AcaML1 from the extreme acidophile *Acidithiobacillus caldus* ATCC 51756. *J Virol* **86**:12452-12453.
135. **Gill JJ, Summer EJ, Russell WK, Cologna SM, Carlile TM, Fuller AC, Kitsopoulos K, Mebane LM, Parkinson BN, Sullivan D, Carmody LA, Gonzalez CF, LiPuma JJ, Young R.** 2011. Genomes and characterization of phages Bcep22 and BcepIL02, founders of a novel phage type in *Burkholderia cenocepacia*. *J Bacteriol* **193**:5300-5313.
136. **Marston MF, Pierciey FJ, Jr., Shepard A, Gearin G, Qi J, Yandava C, Schuster SC, Henn MR, Martiny JB.** 2012. Rapid diversification of coevolving marine *Synechococcus* and a virus. *Proc Natl Acad Sci U S A* **109**:4544-4549.
137. **Lan SF, Huang CH, Chang CH, Liao WC, Lin IH, Jian WN, Wu YG, Chen SY, Wong HC.** 2009. Characterization of a new plasmid-like prophage in a pandemic *Vibrio parahaemolyticus* O3:K6 strain. *Appl Environ Microbiol* **75**:2659-2667.

138. **Garcia P, Monjardin C, Martin R, Madera C, Soberon N, Garcia E, Meana A, Suarez JE.** 2008. Isolation of new *Stenotrophomonas* bacteriophages and genomic characterization of temperate phage S1. *Appl Environ Microbiol* **74**:7552-7560.
139. **Govind R, Fralick JA, Rolfe RD.** 2006. Genomic organization and molecular characterization of *Clostridium difficile* bacteriophage PhiCD119. *J Bacteriol* **188**:2568-2577.
140. **Liu M, Gingery M, Doulatov SR, Liu Y, Hodes A, Baker S, Davis P, Simmonds M, Churcher C, Mungall K, Quail MA, Preston A, Harvill ET, Maskell DJ, Eiserling FA, Parkhill J, Miller JF.** 2004. Genomic and genetic analysis of *Bordetella* bacteriophages encoding reverse transcriptase-mediated tropism-switching cassettes. *J Bacteriol* **186**:1503-1517.
141. **Clark CG, Ng LK.** 2008. Sequence variability of *Campylobacter* temperate bacteriophages. *BMC Microbiol* **8**:49.
142. **Byrne M, Kropinski AM.** 2005. The genome of the *Pseudomonas aeruginosa* generalized transducing bacteriophage F116. *Gene* **346**:187-194.
143. **Kang I, Kang D, Cho JC.** 2012. Complete genome sequence of *Croceibacter* bacteriophage P2559S. *J Virol* **86**:8912-8913.
144. **Sabehi G, Shaulov L, Silver DH, Yanai I, Harel A, Lindell D.** 2012. A novel lineage of myoviruses infecting cyanobacteria is widespread in the oceans. *Proc Natl Acad Sci U S A* **109**:2037-2042.

145. **Bull JJ, Vimr ER, Molineux IJ.** 2010. A tale of tails: Sialidase is key to success in a model of phage therapy against K1-capsulated *Escherichia coli*. *Virology* **398**:79-86.
146. **Huang S, Wang K, Jiao N, Chen F.** 2012. Genome sequences of siphoviruses infecting marine *Synechococcus* unveil a diverse cyanophage group and extensive phage-host genetic exchanges. *Environ Microbiol* **14**:540-558.
147. **Minakhin L, Goel M, Berdygulova Z, Ramanculov E, Florens L, Glazko G, Karamychev VN, Slesarev AI, Kozyavkin SA, Khromov I, Ackermann HW, Washburn M, Mushegian A, Severinov K.** 2008. Genome comparison and proteomic characterization of *Thermus thermophilus* bacteriophages P23-45 and P74-26: siphoviruses with triplex-forming sequences and the longest known tails. *J Mol Biol* **378**:468-480.
148. **Obregon V, Garcia JL, Garcia E, Lopez R, Garcia P.** 2003. Genome organization and molecular analysis of the temperate bacteriophage MM1 of *Streptococcus pneumoniae*. *J Bacteriol* **185**:2362-2368.
149. **Yasmin A, Kenny JG, Shankar J, Darby AC, Hall N, Edwards C, Horsburgh MJ.** 2010. Comparative genomics and transduction potential of *Enterococcus faecalis* temperate bacteriophages. *J Bacteriol* **192**:1122-1130.
150. **Mayer MJ, Narbad A, Gasson MJ.** 2008. Molecular characterization of a *Clostridium difficile* bacteriophage and its cloned biologically active endolysin. *J Bacteriol* **190**:6734-6740.

151. **Tuohimaa A, Riipinen KA, Brandt K, Alatossava T.** 2006. The genome of the virulent phage Lc-Nu of probiotic *Lactobacillus rhamnosus*, and comparative genomics with *Lactobacillus casei* phages. Arch Virol **151**:947-965.
152. **Gregory MA, Till R, Smith MC.** 2003. Integration site for *Streptomyces* phage phiBT1 and development of site-specific integrating vectors. J Bacteriol **185**:5320-5323.
153. **Bajpai R, Soni V, Khandrika L, Jangir PK, Sharma R, Agrawal P.** 2012. Genome sequence of a novel actinophage PIS136 isolated from a strain of *Saccharomonospora* sp. J Virol **86**:9552.
154. **Voelker LL, Dybvig K.** 1999. Sequence analysis of the *Mycoplasma arthritidis* bacteriophage MAV1 genome identifies the putative virulence factor. Gene **233**:101-107.
